# Supplementary material for: Allosteric Transitions of Supramolecular Systems Explored by Network Models: Application to Chaperonin GroEL
Source: PLoS Comput Biol. 2009 Apr 17;5(4):e1000360. doi: 10.1371/journal.pcbi.1000360 (PMC2664929; doi:10.1371/journal.pcbi.1000360)
Supplement: Text S1 — Relationship between cumulative correlation cosine and the angle formed by d (k) and combined eigenvectors (derivation of Eq.(6)). (0.10 MB DOC) [file pcbi.1000360.s008.doc]

**Supplementary Material**

# **1. Relationship between cumulative correlation cosine and the angle formed by d(k) and combined eigenvectors (derivation of Eq.**(6)**)**

The instantaneous distance vector can be expressed as:

The instantaneous deformation vector can, in turn, be written as the summation of weighted eigenvectors (see Eq.(4)) as

We will conveniently omit the subscript *A* and superscript *k* in the following, as the derivation holds for all steps (*k*) and starting conformation (A or B). The dot product of the vectors and can be written in terms of the summations over nonzero modes as

The equality follows from the orthogonality of the eigenvectors, i.e., . Also, since the eigenvectors are normalized,, we obtain

Using the definitions and in Eq., we obtain

On the other hand,

Here we have utilized both orthogonality and unit magnitude properties of the eigenvectors, . Using the definitions of *i* and *F*(*m*), this equality becomes

which implies . Combining this result with Eq. leads to Eq.(6).
